# Antibiotic breakdown by susceptible bacteria enhances the establishment of $\beta$ -lactam resistant mutants

1 **Manja Saebelfeld<sup>1,2\*</sup>, Suman G. Das<sup>1</sup>, Jorn Brink<sup>2</sup>, Arno Hagenbeek<sup>2</sup>, Joachim Krug<sup>1</sup>,**  
2 **J. Arjan G.M. de Visser<sup>2</sup>**

3 <sup>1</sup> Institute for Biological Physics, University of Cologne, Cologne, Germany

4 <sup>2</sup>Laboratory of Genetics, Wageningen University, Plant Sciences Group, Wageningen, The  
5 Netherlands

6 **\* Correspondence:**

7 Manja Saebelfeld

8 [msaebelfeld@gmail.com](mailto:msaebelfeld@gmail.com)

9 **Keywords: *Escherichia coli*,  $\beta$ -lactamase, social interactions, mutant establishment, resistance**  
10 **evolution**

11 **Abstract**

12 For a better understanding of the evolution of antibiotic resistance, it is imperative to study the  
13 factors that determine the initial establishment of mutant resistance alleles. In addition to the  
14 antibiotic concentration, the establishment of resistance alleles may be affected by interactions with  
15 the surrounding susceptible cells from which they derive, for instance via the release of nutrients or  
16 removal of the antibiotic. Here, we investigate the effects of social interactions with surrounding  
17 susceptible cells on the establishment of *Escherichia coli* mutants with increasing  $\beta$ -lactamase  
18 activity (i.e. the capacity to hydrolyze  $\beta$ -lactam antibiotics) from single cells under the exposure of  
19 the antibiotic cefotaxime on agar plates. We find that mutant establishment probability is increased in  
20 the presence of susceptible cells due to the active breakdown of the antibiotic, but the rate of  
21 breakdown by the susceptible strain is much higher than expected based on its low enzymatic  
22 activity. A detailed theoretical model suggests that this observation can be explained by cell  
23 filamentation causing delayed lysis. While susceptible cells may hamper the spread of higher-  
24 resistant  $\beta$ -lactamase mutants at relatively high frequencies, our findings show that they could  
25 promote establishment during their emergence.

26

27 **1 Introduction**

28 Antibiotic resistance has become a worldwide concern, causing 700,000 deaths annually due to failed  
29 treatments (IACG, 2019). As the development of novel drugs does not appear to be promising in the  
30 long-term, other strategies of slowing or halting the emergence of antibiotic resistance have been  
31 explored, including diverse prevention strategies (e.g. rational use of antibiotics and infection  
32 control), the use of biologics or adjuvants to disturb quorum sensing of resistant bacteria, the use of  
33 bacteriophages (reviewed in Aslam et al., 2018) and the exploitation of the evolutionary potential and  
34 interactions of resistance to develop new treatment strategies (Schenk et al., 2012; Palmer and  
35 Kishony, 2013; Baym et al., 2016; Furusawa et al., 2018).

## Antibiotic breakdown by susceptible bacteria enhances the establishment of resistant mutants

36 For a better understanding of the evolution of antibiotic resistance, it is not only important to study  
37 the spread of resistant bacteria, but also the factors that determine the emergence of new resistance  
38 alleles in the first place (Alexander and MacLean, 2020). Resistance alleles can be acquired via  
39 mutation or horizontal gene transfer (Palmer and Kishony, 2013; Blair et al., 2015). In either case,  
40 the resistant allele is initially present at a very low frequency and thus prone to random extinction.  
41 Population genetics theory predicts that only when an allele has survived extinction by genetic drift  
42 and reaches an absolute frequency roughly equal to the inverse of its selection coefficient, its course  
43 becomes dominated by selection in an environment where it is beneficial (Haldane, 1927; Patwa and  
44 Wahl, 2008). Mutations that have survived genetic drift are often called “established” (Levy et al.,  
45 2015; Alexander and MacLean, 2020), although they may still be driven to extinction by the  
46 competition with other mutants (Gerrish and Lenski, 1998; Rozen et al., 2002). The few existing  
47 empirical studies on the establishment of rare alleles have shown that this stochastic process of “drift  
48 loss” is influenced by the initial allele frequency and the fitness benefit of the allele (Chelo et al.,  
49 2013; Gifford et al., 2013).

50 Only a handful of studies so far have systematically investigated the establishment of single bacterial  
51 cells expressing an antibiotic-resistant allele. Those studies found that the probability of a resistant  
52 mutant to establish depends on the type and concentration of nutrients (Coates et al., 2018) and  
53 antibiotics (Coates et al., 2018; Alexander and MacLean, 2020). Alexander and MacLean (2020)  
54 found that the establishment probability of a single streptomycin-resistant *Pseudomonas aeruginosa*  
55 cell was only 5% at a concentration as low as 1/8 of the strains' minimum inhibitory concentration  
56 (MIC) in the absence of a wildtype population. Interestingly, when the same mutant was introduced  
57 into a large population of wildtype cells, its establishment was strongly increased under the same  
58 streptomycin concentrations compared to the absence of the wildtype. The authors speculated that  
59 this effect was due to the removal of the antibiotic from the environment via binding to wildtype cell  
60 components (Alexander and MacLean, 2020).

61 Determining factors that influence the establishment of antibiotic-resistance alleles could have  
62 implications in a clinical context, for instance by adjusting drug dosing strategies to a point where the  
63 establishment of *de novo* mutations is strongly reduced (Alexander and MacLean, 2020). For this,  
64 interactions between newly arising resistance alleles and nearby sensitive cells must be understood  
65 better. Apart from drug removal by binding to cellular components, other common goods, such as  
66 enzymes causing antibiotic hydrolysis or the release of nutrients from killed cells, may play a role. A  
67 good model system to study such social interactions is TEM-1  $\beta$ -lactamase. This enzyme is expressed  
68 in the periplasmic space of the bacterial cell wall, where it hydrolyses  $\beta$ -lactam antibiotics such as  
69 penicillins. This leads to a reduction of the antibiotic concentration in the environment and may  
70 support the growth of susceptible cells (Brown et al., 2009; Medaney et al., 2016; Nicoloff and  
71 Andersson, 2016). Such cooperative behavior is expected to be more pronounced in structured  
72 environments, such as biofilms, than in unstructured ones, due to stronger effects of enzymatic  
73 breakdown on local antibiotic concentrations (Medaney et al., 2016; Rojo-Molinero et al., 2019). If  
74 and to what extent such interactions affect the establishment of  $\beta$ -lactamase mutants conferring  
75 higher resistance, is unknown.

76 Here, we tested the effect of relatively antibiotic-susceptible cells on the establishment of higher-  
77 resistance TEM-1  $\beta$ -lactamase alleles. In particular, we distinguished between possible effects of  
78 increased nutrient availability due to cell lysis and drug removal via  $\beta$ -lactamase activity or binding  
79 to cellular components. We used the  $\beta$ -lactam antibiotic cefotaxime (CTX) and different strains of  
80 the bacterium *Escherichia coli*, expressing  $\beta$ -lactamase alleles with varying activity against CTX. We  
81 simulated the establishment process of CTX-resistant *E. coli* by introducing a low number of mutant  
82 cells into populations of more susceptible cells on CTX-containing agar plates. Our results revealed

## Antibiotic breakdown by susceptible bacteria enhances the establishment of resistant mutants

83 substantial increases in mutant establishment probability by susceptible cells. By using heat-killed  
 84 susceptible cells and measuring the CTX-reducing capacity of mutants compared to the wildtype, we  
 85 distinguished between the effects from nutrient addition by cell lysis and antibiotic removal via either  
 86 CTX binding or hydrolysis on mutant establishment. Lastly, to understand an unexpectedly large  
 87 effect on mutant establishment by the ancestral TEM-1 strain, we used a detailed dynamical model.  
 88 This model suggests that certain population dynamic parameters, such as cell filamentation and  $\beta$ -  
 89 lactamase synthesis rate, may have played a crucial role during the establishment of the higher-  
 90 resistance mutants.

## 91 2 Material and Methods

### 92 2.1 Strains and culture conditions

93 Several strains, derived from *Escherichia coli* strain MG1655 were used for the experiments. This  
 94 strain had previously been modified with either a YFP (yellow fluorescent protein) or a BFP (blue  
 95 fluorescent protein) chromosomal marker cassette, containing a resistance gene for chloramphenicol  
 96 (Gullberg et al., 2014). For the current study, the chloramphenicol resistance was removed to serve as  
 97 the Wildtype strain (Table 1). Into each of the two fluorescently-marked Wildtype strains, each of  
 98 four TEM variants was inserted into the *galK* locus: TEM-1 (from now on referred to as “Ancestral”  
 99 strain), and three mutant alleles with either 1, 2 or 3 point mutations in the TEM gene (from now on  
 100 referred to as “Single mutant”, “Double mutant” and “Triple mutant”, respectively; cf. Table 1). All  
 101 TEM loci are under the control of the *lacI* repressor and are expressed by adding 50  $\mu$ M Isopropyl  $\beta$ -  
 102 D-1-thiogalactopyranoside (IPTG) to the growth medium. While the TEM-1 allele confers very low  
 103 activity towards CTX, the three mutants show increasing CTX resistance with each additional  
 104 substitution. The minimum inhibitory concentration (MIC) for CTX was determined per strain in  
 105 duplicates (for each of the YFP and BFP variants), using 2-fold increases in CTX concentration in  
 106 microtiter plates filled with 200  $\mu$ l M9 minimal medium (containing 0.4% glucose, 0.2%  
 107 casaminoacids, 2  $\mu$ g/ml uracil and 1  $\mu$ g/ml thiamine) and 50  $\mu$ M IPTG, inoculated with  $10^5$  cells and  
 108 incubated for 24h at 37°C (cf. Table 1).

109 For setting up the experiments, all strains were grown overnight at 37°C and 250 rpm in 1-2 ml M9  
 110 medium. The cultures were either directly inoculated from the -80°C glycerol stocks or first streaked  
 111 out on LB (Luria-Bertani) agar plates from which a single colony was picked into the liquid M9  
 112 medium. After overnight incubation, the cultures were serially diluted with phosphate-buffered saline  
 113 (PBS) to the density needed for the particular experiment (see below). For the *Interaction*  
 114 *experiments* on agar, the diluted cultures (or culture mixtures) were spread on 92 mm plates  
 115 containing M9 medium (as above) with 1.5 % agar, 50  $\mu$ M IPTG and the respective CTX  
 116 concentration as specified by the particular experiment (see below).

117 **Table 1:** Overview of the used strains.

| Wildtype strain<br>(without TEM<br>allele*) | TEM amino acid<br>substitutions | MIC for CTX<br>( $\mu$ g/ml) | Strain name<br>(as used here) |
|---------------------------------------------|---------------------------------|------------------------------|-------------------------------|
| MG1655 DA28100                              | none (TEM-1)                    | 0.08                         | TEM-1 Ancestor                |
| galK::YFP $\Delta$ CAT-                     | G238S                           | 0.64                         | Single mutant                 |
| or                                          | E104K/G238S                     | 10.24                        | Double mutant                 |
| galK::BFP $\Delta$ CAT-                     | E104K/M182T/G238S               | 81.92                        | Triple mutant                 |

118 MIC = minimum inhibitory concentration; \*MIC of the Wildtype strain for CTX = 0.04  $\mu$ g/ml

## Antibiotic breakdown by susceptible bacteria enhances the establishment of resistant mutants

### 119 2.2 Interaction experiment 1

120 First, we tested whether the previous observation that the establishment of an antibiotic-resistant  
121 mutant increases in the presence of susceptible cells (Alexander and MacLean, 2020), also applies to  
122 our TEM-1  $\beta$ -lactamase system. For this, roughly 150 cells each of the three *E. coli* TEM mutants  
123 (Table 1) were introduced into populations of bacteria expressing the ancestral TEM-1 allele. All  
124 three mutants were plated alone or together with two densities of Ancestor cells under two CTX  
125 concentrations on M9 agar plates. The two tested CTX concentrations differed per mutant and were  
126 chosen to show single-cell establishment probabilities of about 50% and 80% compared to no CTX  
127 (Saebelfeld et al., bioRxiv preprint 2021). Overnight cultures of the mutants were serially diluted to  
128 approximately  $3 \times 10^3$  cells/ml, and the TEM-1 Ancestor overnight culture was serially diluted to  
129  $2 \times 10^7$  cells/ml and  $2 \times 10^4$  cells/ml. The mutant dilutions were then mixed 1:1 with either PBS or each  
130 of the two Ancestor density dilutions. Of those mixtures, 100  $\mu$ l aliquots were spread on M9 plates  
131 containing the respective CTX concentrations (15 replicates per condition), using a bacterial  
132 spreader, resulting in  $\sim 150$  cells of the respective mutant strain plated with either 0,  $\sim 10^3$ , or  $\sim 10^6$   
133 Ancestor cells. All used CTX concentrations were above the Ancestor MIC, allowing only for the  
134 mutant cells to grow into colonies. The plates were incubated at 37°C until the mutant colonies were  
135 big enough to count them unambiguously (20h-40h); the number of colony-forming units (CFUs) per  
136 plate was counted under white light, using a digital colony counter. To ensure that all counted  
137 colonies were indeed mutants, the BFP-expressing Ancestor strain, and the YFP-expressing mutant  
138 strains were used for this experiment. Within the lowest CTX concentration treatment for the Single  
139 mutant, one replicate of each tested Ancestor density was excluded from the dataset, as overlapping  
140 colonies prevented unambiguous CFU counts. After colony counting, all plates were checked under a  
141 fluorescence microscope (LEICA M165 FC), using GFP and CFP filters for detecting the YFP and  
142 BFP signals, respectively. For the Single mutant, a single colony containing the BFP Ancestor  
143 fluorophore was found within the  $10^6$  ancestral cells treatment in each one replicate of the two tested  
144 CTX concentrations. These two colonies were subtracted from the CFU counts.

### 145 2.3 Interaction experiment 2

146 To test whether nutrient release from lysed cells and/or enzymatic breakdown of CTX could explain  
147 the observed positive effect on mutant establishment probability, we conducted a second plating  
148 experiment where approximately 150 Triple mutant cells were introduced into populations of  $\sim 10^6$   
149 cells of either the TEM-1 Ancestor or the TEM Single mutant (with  $\sim 130$ -fold higher catalytic  
150 efficiency against CTX relative to TEM-1, see Salverda et al., 2011) under the same two CTX  
151 concentrations as in the *Interaction experiment 1*. In addition, the Triple mutant was introduced into  
152 populations of  $\sim 10^6$  cells of heat-killed Ancestor or heat-killed Single mutant cells, to test whether  
153 nutrient addition from cell lysis alone could explain the observed pattern.

154 To set up the experiment, half of the overnight culture of each of the YFP TEM-1 Ancestor and YFP  
155 Single mutant was heat-killed via incubation at 80°C for 3 hours and then put on ice for 20 minutes.  
156 An overnight culture of the BFP Triple mutant was serially diluted to  $3 \times 10^3$  cells/ml, and the alive  
157 and heat-killed overnight cultures of the YFP Ancestor and YFP Single mutant were diluted to  $2 \times 10^7$   
158 cells/ml. The Triple mutant dilution was then mixed 1:1 with either PBS or the dilutions of alive or  
159 heat-killed Ancestor or alive Single mutant strains. 100  $\mu$ l aliquots of these mixtures were then  
160 spread on M9 plates containing 1.44 or 1.76  $\mu$ g/ml CTX (i.e. the same concentrations as used for the  
161 Triple mutant in the first interaction experiment; equivalent to 0.018 and 0.021% of the Triple  
162 mutant's MIC), using 3 mm glass beads. As for the previous experiment, the used CTX  
163 concentrations were higher than the Ancestor and Single mutant MICs (see Table 1), so that only  
164 Triple mutant cells were expected to form colonies. The plates were incubated at 37°C until the

## Antibiotic breakdown by susceptible bacteria enhances the establishment of resistant mutants

165 colonies were big enough to count them unambiguously (16-20 h); the number of colony-forming  
166 units (CFUs) per plate was counted under white light, using a digital colony counter. To ensure that  
167 the counted colonies were Triple mutants, a fluorescence microscope was used as described above.  
168 No colonies expressing the YFP fluorophore (i.e. used for the Ancestor and Single mutant strains)  
169 were found. For each tested condition, 15 replicates were set up. To estimate the added number of  
170 cells per strain, the dilution containing only the Triple mutant was spread on 15 M9 plates without  
171 CTX. The alive Ancestor and alive Single mutant cell dilutions were further diluted to  $10^3$  cells/ml;  
172 200, 100 and 50  $\mu$ l aliquots of these dilutions were spread on three LB agar plates each. All plates  
173 were incubated overnight at 37°C. Colony counts of the alive Ancestor and Single mutant cells  
174 showed that the initially added numbers in the experimental setup were comparable with  $1.05 \times 10^6$   
175 and  $1.01 \times 10^6$  cells for each strain, respectively.

### 176 2.4 Bioassay

177 The antibiotic removal capacity of three strains was tested in a bioassay: the YFP TEM-1 Ancestor  
178 and TEM Single mutant, as used in the *Interaction experiment 2*, and in addition the YFP Wildtype  
179 strain (Table 1). This Wildtype strain does not contain a TEM allele and thus does not display any  $\beta$ -  
180 lactamase activity, but is otherwise genetically identical to both the TEM-1 Ancestor and Single  
181 mutant strains. This means that it contains the same number of penicillin-binding proteins (PBPs),  
182 which is the main target for CTX and thus controls for the difference of CTX removal via breakdown  
183 and target binding.

184 Overnight cultures of each strain were diluted 1:10 into 1 ml M9 medium, containing 50  $\mu$ M IPTG  
185 and 1.76  $\mu$ g/ml CTX (i.e. the highest tested concentration from the agar experiments) in three  
186 replicate tubes. In addition, heat-killed cells (as described above) of each strain were inoculated the  
187 same way. To control for spontaneous CTX breakdown under the tested conditions, three tubes were  
188 incubated in the absence of bacterial cells (CTX-only medium controls). For this, the M9 medium  
189 with CTX was mock-inoculated 1:10 with the M9 medium that was used for the overnight cultures  
190 the day before. All tubes were incubated for three hours at 37°C and 250 rpm. Although the CTX  
191 concentration was at least three-fold higher than the MIC of the strains, all alive cultures showed  
192 growth after the 3-hours incubation. This is likely to be attributed to an inoculum effect (Queenan et  
193 al., 2004), i.e. the increase of MIC with increasing inoculum size. The MIC is commonly tested at  
194  $5 \times 10^5$  cells/ml while in our setup, the cultures contained densities of about  $2 \times 10^8$  cells/ml. We  
195 estimate the final density of the cultures to be  $\sim 10^9$  cells/ml after the 3-hours incubation.

196 After incubation, all tubes were centrifuged for 1 minute at 4000 rpm. The supernatant was sterilized  
197 through a 0.2  $\mu$ m filter and used for setting up MIC assays. For this, the supernatant of each test tube  
198 was diluted in 1.35-fold steps with fresh M9 medium, containing 50  $\mu$ M IPTG. In total, 11 putative  
199 CTX concentrations (i.e. assuming no removal) ranging from 0.04 to 0.79  $\mu$ g/ml were tested per  
200 culture in 96-well plates. All wells were inoculated with  $\sim 10^5$  cells of the YFP TEM-1 Ancestor  
201 strain in a total volume of 200  $\mu$ l per well. Growth of this strain in higher putative CTX  
202 concentrations would indicate the removal of CTX from the medium during the initial 3-hour culture  
203 incubation. Controls included (i) a filtration control: per culture, undiluted supernatant was mock-  
204 inoculated with M9<sub>IPTG50</sub> medium, i.e. without bacterial cells to control for removal of alive cells  
205 after filtration; (ii) a growth control: M9<sub>IPTG50</sub> medium without CTX was inoculated with  $\sim 10^5$   
206 Ancestor cells; and (iii) a blank medium control consisting of M9<sub>IPTG50</sub> medium only. The 96-well  
207 plates were incubated for 18 hours at 37°C (static). After incubation, OD at 600 nm of all wells was  
208 measured in a plate reader (Victor3™, PerkinElmer) without the plate lid. None of the supernatant or  
209 blank medium controls showed growth. The threshold to determine growth was set to an OD of 0.1.  
210 MICs were determined as the highest putative CTX concentration that did not show growth. To

## Antibiotic breakdown by susceptible bacteria enhances the establishment of resistant mutants

211 determine the amount of CTX removal from the initial cultures, the putative MIC per replicate was  
212 corrected for its dilution factor and the average MIC of the CTX-only medium controls. The resulting  
213 concentrations were then averaged across the three replicates per treatment.

### 214 **2.5 Statistical analyses of the Interaction experiments**

215 To test for a significant effect of the respective treatment on the number of mutant colony-forming  
216 units (CFUs), two-way ANOVAs were performed. For the analysis of *Interaction experiment 1*, the  
217 CFU counts were square-root transformed and the effects of CTX concentration and added number of  
218 Ancestor cells were included as fixed factors, followed by a Tukey's HSD test. For the analysis of  
219 *Interaction experiment 2*, the effects of CTX concentration and background population were included  
220 as fixed factors after checking for homogeneous variances of the residuals and normal distribution of  
221 the data, followed by a Tukey's HSD test. All statistical analyses were conducted in R v.3.6.2 (R  
222 Core Team, 2019) with the *car* package (Fox and Weisberg, 2019) to perform Levene tests; Figures 1  
223 and 2 were produced using the package *ggplot2* (Wickham, 2016).

## 224 **3 Results**

### 225 **3.1 Susceptible cells facilitate the establishment of $\beta$ -lactamase mutants**

226 In a first plating experiment, we tested whether the presence of TEM-1 Ancestor cells affected the  
227 establishment of three TEM mutants with increasing CTX resistance at two CTX concentrations.  
228 Generally, the presence of ancestral cells increased the number of established mutant cells of all three  
229 tested mutants (Figure 1), although this difference was not significant for all tested treatment  
230 comparisons (Supplement 1: Table S1). Moreover, establishment probability increased with  
231 Ancestral cell density under all conditions (Figure 1).

## Antibiotic breakdown by susceptible bacteria enhances the establishment of resistant mutants

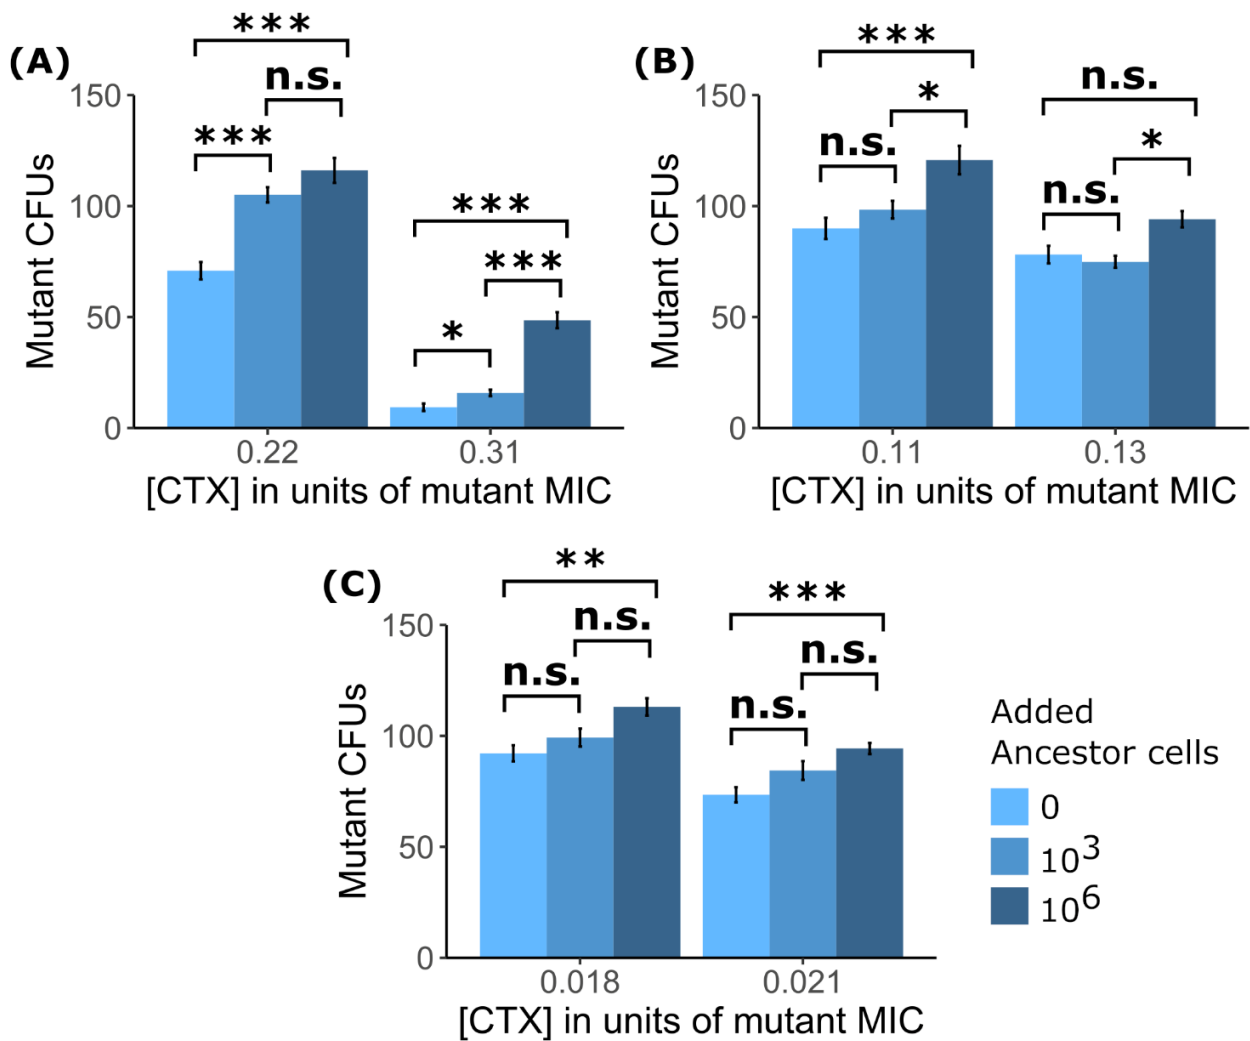

232  
 233 **Figure 1:** The establishment of single cells into visible colonies of the three tested TEM mutants is  
 234 shown as counts of colony-forming units (CFUs) of (A) the Single mutant, (B) the Double mutant  
 235 and (C) the Triple mutant under exposure to two CTX concentrations (shown as a fraction of each  
 236 strain's minimum inhibitory concentration – MIC) in either the absence of TEM-1 Ancestor cells or  
 237 the presence of Ancestor cells at two different densities. Significance levels based on Tukey's HSD  
 238 tests are shown within CTX concentrations, between the number of added Ancestor cells after  
 239 running two-way ANOVA's over the whole dataset per mutant strain (cf. Supplement 1: Table S1).  
 240 n.s. = not significant, \* $p < 0.05$ , \*\* $p < 0.01$ , \*\*\* $p < 0.001$ .

241

### 242 3.2 Mutant establishment is particularly affected by live cells expressing active $\beta$ -lactamase

243 In a subsequent plating experiment, we tested whether nutrient access via lysed cells or CTX removal  
 244 via enzymatic breakdown explains the positive effect of susceptible bacteria on the establishment of  
 245 the resistant mutants. To do so, the Triple mutant was introduced into populations of either heat-  
 246 killed or alive TEM-1 Ancestor or Single mutant cells under two CTX concentrations. When plated  
 247 alone, the fraction of established Triple mutant cells, determined as colony-forming units (CFUs),  
 248 decreased by approximately 34% and 50% in the low and high CTX concentrations compared to no  
 249 CTX, respectively (Figure 2). The addition of heat-killed TEM-1 Ancestor or TEM Single mutant

## Antibiotic breakdown by susceptible bacteria enhances the establishment of resistant mutants

250 cells did not affect the establishment of the Triple mutant at either CTX concentration (Figure 2;  
251 Supplement 2: Table S2). However, the addition of alive Ancestor cells significantly increased the  
252 establishment of the Triple mutant under both CTX concentrations. This increase was further  
253 pronounced by the presence of alive Single mutant cells (Figure 2; Supplement 2: Table S2),  
254 suggesting an important role for enzymatic breakdown.

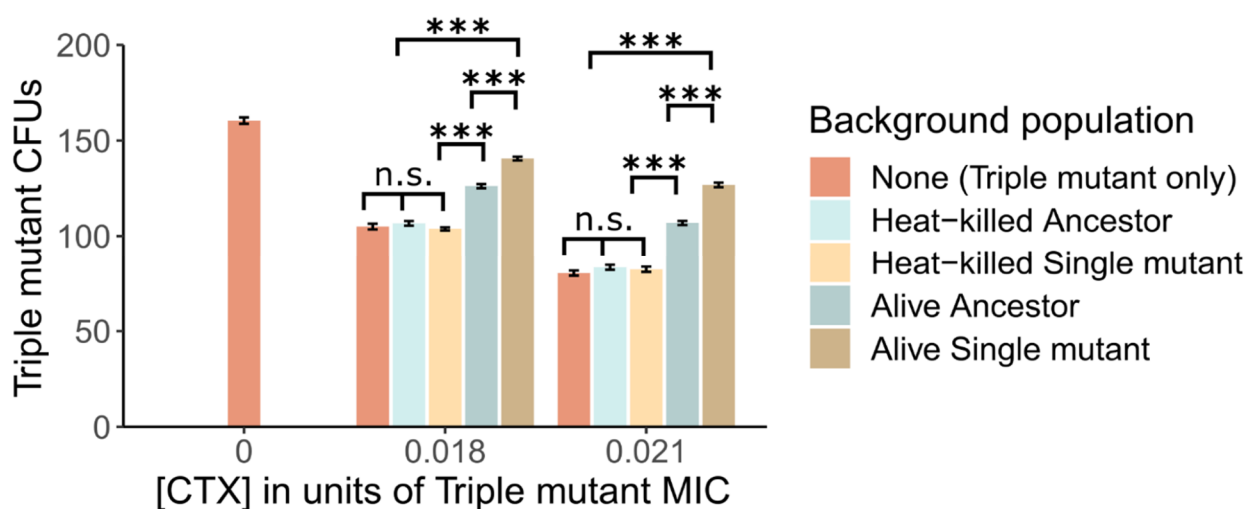

255 **Figure 2:** The establishment of Triple mutant cells is shown as counts of colony-forming units  
256 (CFUs) under the exposure of two CTX concentrations (shown as a fraction of the Triple mutant's  
257 minimum inhibitory concentration – MIC), in the absence and presence of a “Background  
258 population”:  $10^6$  alive or heat-killed TEM-1 Ancestor cells, and alive or heat-killed TEM Single  
259 mutant cells. In addition, the number of Triple mutant CFUs is shown in the absence of CTX.  
260 Significance levels based on Tukey's HSD tests are shown within CTX concentrations, between the  
261 type of Background population after running two-way ANOVA's over the whole dataset (cf.  
262 Supplement S2: Table S2). n.s. = not significant, \*\*\* $p < 0.001$ .  
263

264

### 265 3.3 Test of CTX removal via target binding or breakdown

266 To confirm whether the increased establishment probability of the TEM Triple mutant in the  
267 presence of alive cells (Figure 2) is due to CTX removal, and examine the contribution of CTX  
268 binding and hydrolysis during this process, we performed a bioassay to estimate CTX removal for the  
269 Wildtype (no TEM), the TEM-1 Ancestor and the TEM Single mutant strains. We estimated the CTX  
270 removal rate of the three strains by culturing alive and heat-killed cells of each strain in medium with  
271 a supra-MIC CTX concentration for three hours and then using the cell-free medium in a standard  
272 MIC assay with the TEM-1 Ancestral strain (see Methods). Results show that the alive TEM-1  
273 Ancestor and TEM Single mutant removed 0.29 and 0.43  $\mu\text{g/ml}$  CTX (from the initial 1.79  $\mu\text{g/ml}$ )  
274 from the liquid medium, respectively. Neither the Wildtype strain without the TEM allele nor the  
275 heat-killed mutants showed a decrease in CTX concentration (Table 2), supporting a significant role  
276 only for the  $\beta$ -lactamase in CTX removal.

277



## Antibiotic breakdown by susceptible bacteria enhances the establishment of resistant mutants

278 **Table 2:** CTX removal from liquid medium in the bioassay by strains expressing different  $\beta$ -lactamase  
279 alleles or no  $\beta$ -lactamase, after 3 hours of incubation.

| Strain                                                             | Culture condition | CTX removal (in $\mu\text{g/ml}$ ) |
|--------------------------------------------------------------------|-------------------|------------------------------------|
| <b>TEM-1 Ancestor</b><br>(low $\beta$ -lactamase activity)         | Alive cells       | 0.29                               |
|                                                                    | Heat-killed cells | 0                                  |
| <b>TEM Single mutant</b><br>(moderate $\beta$ -lactamase activity) | Alive cells       | 0.43                               |
|                                                                    | Heat-killed cells | 0                                  |
| <b>Wildtype</b><br>(no $\beta$ -lactamase activity)                | Alive cells       | 0                                  |
|                                                                    | Heat-killed cells | 0                                  |

280

### 281 3.4 Modeling the dynamic interactions between resistant and susceptible strains

282 Motivated by the observation that only strains expressing TEM  $\beta$ -lactamase reduce the concentration  
283 of CTX, we attempted to predict the amount of CTX removal from the agar medium in the  
284 experiment described above (Figure 2). In related work (Saebelfeld et al., bioRxiv preprint 2021), we  
285 obtained an estimate of the establishment probability of the Triple mutant grown alone on agar under  
286 similar conditions as a continuous function of CTX concentration through curve-fitting on a larger  
287 data set (Supplement 2: Figure S1). If we assume that the increased establishment probability in the  
288 presence of other cells in the experiment presented in Figure 2 is solely due to CTX breakdown, we  
289 can use the establishment probabilities to estimate the CTX reduction by finding the point on the  
290 curve corresponding to the increased establishment probability and its corresponding concentration  
291 (cf. Supplement 2: Figure S1). Using this, we estimate that the TEM-1 Ancestor reduces the  
292 concentration by about 0.06  $\mu\text{g/ml}$  at 1.44  $\mu\text{g/ml}$  CTX (4% reduction), and by about 0.25  $\mu\text{g/ml}$  at  
293 1.76  $\mu\text{g/ml}$  CTX (14% reduction), whereas the Single mutant reduces the concentration by about 0.21  
294  $\mu\text{g/ml}$  at 1.44  $\mu\text{g/ml}$  CTX (15% reduction), and by about 0.39  $\mu\text{g/ml}$  at 1.76  $\mu\text{g/ml}$  CTX (22%  
295 reduction). These estimates are subject to large uncertainties but appear nevertheless to be roughly  
296 consistent with the results of the bioassay. However, our estimates also indicate that the CTX  
297 reduction by the Ancestral strain is surprisingly high, considering its approximate 130-fold lower  
298 catalytic efficiency relative to the Single mutant.

299 To explain the unexpectedly high antibiotic removal by the Ancestor, we used a modelling approach.  
300 We begin with considering the difference in catalytic efficiency ( $k_{cat}/K_M$ ) of the Ancestor and  
301 Single mutant TEM variants. Based on reported estimates for both variants (Salverda et al., 2011)  
302 and assuming constant conditions, we predict a net reduction of CTX from the medium of 0.06% for  
303 the TEM-1 Ancestor and 7.5% for the Single mutant (Supplement 3). While the prediction for the  
304 Single mutant can be considered roughly consistent with our experimental finding (given the crude  
305 nature of the estimate and the data), the prediction for the Ancestor is two orders of magnitude  
306 smaller and inconsistent with its observed only one-third smaller reduction (Table 2). Indeed, given  
307 that TEM-1 has very low activity, it is surprising that it achieves even a measurable reduction. One  
308 possible explanation is that the ancestral enzyme (TEM-1), while breaking down the antibiotics at a  
309 very low rate, nonetheless binds the antibiotic at a high rate (Queenan et al., 2004). However, this  
310 explanation seems unlikely, because removal by binding happens only for one antibiotic molecule  
311 per enzyme molecule in the periplasmic space, whereas the turnover rate due to degradation by the  
312 Single mutant is about 810 antibiotic molecules per enzyme molecule in 30 minutes (which is the  
313 scale of cell division time; the number of antibiotic molecules degraded is obtained from the reaction  
314 rate estimates in Supplement 3). Thus, binding without hydrolysis cannot explain the finding that the  
315 Ancestor and Single mutant remove CTX at comparable rates.

## Antibiotic breakdown by susceptible bacteria enhances the establishment of resistant mutants

316 To investigate this issue further, we used a model introduced in Geyrhofer and Brenner (2020) which  
317 incorporates not just enzyme kinetics but also cell growth and death, and the exchange of enzyme and  
318 antibiotics between cells and the environment. Details on the dynamical model can be found in  
319 Supplement 4. In short, this model presents a more realistic picture of the dynamical process  
320 underlying antibiotic removal. Cell numbers decrease initially at high antibiotic concentration, while  
321 simultaneously removing antibiotic through  $\beta$ -lactamase synthesis and secretion. Depending on the  
322 inoculum size, the decrease in antibiotic concentration in the medium can lead to a resurgence in cell  
323 growth at a later time (see Figure 3). The model has a multi-dimensional parameter space that can be  
324 explored to locate the source of the unexpectedly high antibiotic removal by the Ancestral strain.  
325 Many of the parameters in the model can be either determined from the literature or have an  
326 insignificant impact on the results (Supplement 4). However, two important parameters that are left  
327 undetermined are  $\sigma_B$  and  $\sigma_E$ , which are the rate constants for the flux of antibiotic and enzyme,  
328 respectively, between the cells and the environment.

329 One possibility is that the enzyme synthesis and/or permeability parameters  $\sigma_B$  and  $\sigma_E$  differ for  
330 TEM-1 Ancestor and Single mutant. For example,  $\sigma_B$  and  $\sigma_E$  could be higher in the TEM-1 Ancestor  
331 due to higher rates of cell wall defects, although there is no empirical support for this to our  
332 knowledge. However, numerical simulations show that the discrepancy is not explained even when  
333  $\sigma_E$  and  $\sigma_B$  are two orders of magnitude higher for the Ancestor. As this phenomenon by itself does  
334 not provide a satisfactory explanation, we considered a possible additional role of cell filamentation.  
335 We know that our *E. coli* strain undergoes filamentation under CTX exposure, and both the rate of  
336 filamentation (Jeffrey Power, personal communication) and time of subsequent cell lysis (Zahir et al.,  
337 2020) are strongly strain-dependent. Further, during filamentation, the biomass of the cells keeps  
338 growing, even though cell division does not occur due to inhibited septum formation (Pogliano et al.,  
339 1997). Filamenting cells, therefore, continue to synthesize enzyme that breaks down the antibiotic,  
340 even if many of them eventually lyse and die (Zahir et al., 2020). If we assume that in our  
341 experiments the TEM-1 Ancestor cells do filament (and do not lyse within the experimental duration)  
342 and that enzyme production is proportional to biomass growth whereas this is not the case for the  
343 Single mutant, this can be incorporated in the model by setting the growth rate parameter to be  
344 independent of the antibiotic concentration. Under this assumption, the breakdown by the Ancestor  
345 becomes comparable to that of the Single mutant in the relevant parameter range. For  $\sigma_E = 2.81 h^{-1}$ ,  
346  $\sigma_B = 1 h^{-1}$ , the reduction is 1.8%, which is significantly higher than the value obtained without  
347 filamentation, but still lower than what is expected from the bioassay data (see Supplement 4: Figure  
348 S2). But moderately higher values of enzyme expression and release produce better results. For  
349 example, with  $\sigma_E = 16 h^{-1}$ ,  $\sigma_B = 9.2 h^{-1}$  we get a 10% reduction. The simulated reduction of  
350 antibiotic concentration by filamenting ancestral cells is shown in Figure 3.

## Antibiotic breakdown by susceptible bacteria enhances the establishment of resistant mutants

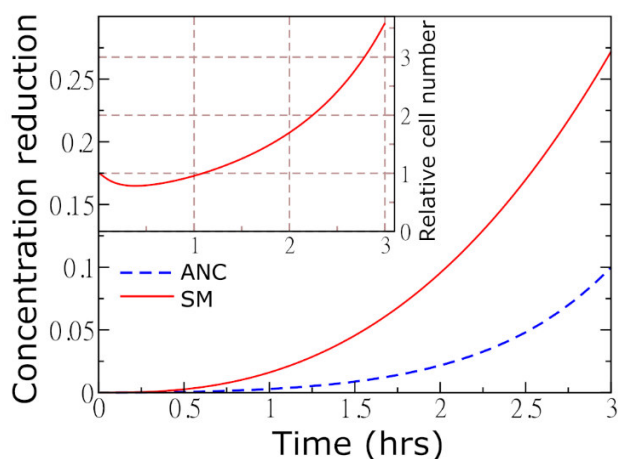

351  
352 **Figure 3:** The reduction of concentration as a function of time. Parameters: TEM-1 Ancestor (ANC)  
353  $\sigma_E = 16 h^{-1}$ ;  $\sigma_B = 9.2 h^{-1}$ ; single mutant  $\sigma_E = 2.81 h^{-1}$ ;  $\sigma_B = 1 h^{-1}$ . The inset shows the number  
354 of Single mutant (SM) cells relative to the initial number as a function of time. The cells die initially  
355 and then the numbers grow again as antibiotic concentration is reduced. The Ancestor cells are  
356 assumed to filament but not to divide or die.

357

## 358 4 Discussion

359 We examined whether and how the establishment of *de novo* antibiotic-resistant mutant cells was  
360 affected by more susceptible resident cells. The successful establishment of a mutant cell was  
361 determined by its outgrowth into a colony-forming unit, visible to the naked eye. We first showed  
362 that the establishment probability of three separately tested TEM  $\beta$ -lactamase mutants with  
363 increasing hydrolysis activity against the cephalosporin CTX was increased when introduced into  
364 populations of the Ancestor strain with very low  $\beta$ -lactamase activity under exposure to two CTX  
365 concentrations. This positive effect increased with the density of Ancestor cells.

366 We next hypothesized that three, mutually not exclusive, mechanisms could be involved in  
367 enhancing mutant establishment probability. First, as the Ancestor cells died in the presence of the  
368 antibiotic, additional nutrients provided by cell lysis could support mutant establishment. It has been  
369 shown repeatedly that contents released from decaying bacterial cells can be reutilised by growing  
370 cells (e.g. Koch, 1959; Banks and Bryers, 1990; Rozen et al., 2009). Coates et al. (2018) found that  
371 the establishment of antibiotic-resistant *E. coli* mutants under antibiotic exposure was lower in a poor  
372 than in a rich nutrition environment due to a reduction in growth rate. As we used M9 minimal  
373 medium in our experiments, it is conceivable that extra nutrients released from dying Ancestor cells  
374 supported mutant establishment. Second, the Ancestor cells may have depleted CTX molecules via  
375 binding to penicillin-binding proteins (PBPs), which are the main target of CTX (Cho et al., 2014),  
376 thereby reducing the antibiotic concentration in the medium (Udekwa et al., 2009; Abel Zur Wiesch  
377 et al., 2015). Third, Ancestor cells may have reduced the environmental CTX concentration by  
378 catalyzing its hydrolysis, even though the  $\beta$ -lactamase activity against CTX of this strain is low.

379 A positive effect of susceptible cells on the establishment of *de novo* antibiotic-resistance conferring  
380 mutations has been reported before for *P. aeruginosa* in the presence of streptomycin (Alexander and  
381 MacLean, 2020). The authors speculated that the mechanism for this effect was the binding of the  
382 antibiotics to components of the susceptible cells. The main target for streptomycin is ribosomes  
383 (Demirci et al., 2013), a major cell component with numbers ranging between a few thousand to

## Antibiotic breakdown by susceptible bacteria enhances the establishment of resistant mutants

384 several ten-thousands per cell, depending on growth rate and species (Martin and Iandolo, 1975;  
385 Bremer and Dennis, 1996; Barrera and Pan, 2004; Leskelä et al., 2005). CTX predominantly binds to  
386 PBP3 (Jones and Thornsberry, 1982; Piras et al., 1990), which is present at about 60 to 130 units per  
387 *E. coli* cell, depending on the medium and growth rate (Dougherty et al., 1996). Thus, the antibiotic  
388 reduction via binding to cellular components can be expected to be much lower in our experimental  
389 system compared to that of Alexander and MacLean (2020). Indeed, we found that the Wildtype  
390 strain without  $\beta$ -lactamase was not able to remove detectable amounts of CTX from the liquid  
391 medium (Table 2). This indicates that the removal of CTX via binding to cellular components is  
392 negligible in our system.

393 To test whether nutrient release from decaying cells promoted mutant establishment, we used heat-  
394 killed TEM-1 Ancestor and Single mutant cells. Heat-killing was chosen to inactivate the  $\beta$ -  
395 lactamases as hydrolyzing enzymes can further break down antibiotics after cell death (Udekwu et  
396 al., 2009; Lenhard and Bulman, 2019). To sustain one cell, an estimated 110 heat-killed *E. coli* cells  
397 are needed to provide sufficient nutrients (Nioh and Furusaka, 1968). Thus, some 16,500 heat-killed  
398 Ancestor or Single mutant cells would have been needed to sustain the growth of the 150 plated  
399 Triple mutant cells under starving conditions. The absence of an effect of  $10^6$  added heat-killed cells  
400 on the establishment of the Triple mutant (Figure 2) suggests that the addition of nutrients due to  
401 cells lysis plays a negligible role under the tested conditions, leaving CTX removal from the  
402 environment as the most probable explanation for the observed positive effect on mutant  
403 establishment. However, we cannot rule out that our method of heat-killing causes only a fraction of  
404 the cells to lyse and release nutrients (Smakman and Hall, bioRxiv preprint 2020).

405 The establishment of the Triple mutant was increased when introduced into the moderately-active  
406 Single mutant population compared to the low-activity TEM-1 Ancestor (see Figure 2), indicating  
407 that hydrolysis of the antibiotic contributes to the observed effect. This was further supported by the  
408 results of the bioassay, where both the TEM-1 Ancestor and the TEM Single mutant were able to  
409 remove CTX from the liquid medium, whereas the Single mutant removed more of the antibiotic than  
410 the Ancestor (Table 2). However, the CTX removal rate by the Ancestor and its effect on Triple  
411 mutant establishment are unexpectedly high when compared with the Single mutant. Specifically, the  
412 Ancestor removed about two-thirds of the amount of CTX (Table 2) and restored roughly half of the  
413 lost established Triple mutant cells compared to the Single mutant (Figure 2), despite its 130-fold  
414 lower catalytic efficiency against CTX (Salverda et al., 2011). Thus, CTX hydrolysis based on  
415 enzyme kinetics alone cannot explain the observed effect of the Ancestor. To investigate this further,  
416 we adapted a model introduced by Geyrhofer and Brenner (2020), where the effect of cell  
417 filamentation could be incorporated by allowing the biomass of cells to grow without cell division in  
418 the presence of the antibiotic. Exploration of various scenarios using this model indicates that  
419 delayed lysis of filamentous cells, coupled with an increased  $\beta$ -lactamase release due to cell wall  
420 permeability and increased  $\beta$ -lactamase synthesis rate, may explain the unexpectedly high breakdown  
421 of CTX by the TEM-1 Ancestor. While these results are not conclusive, they do point to interesting  
422 directions for future work.

423 Previous studies comparing antibiotic resistance evolution on agar and liquid medium showed strong  
424 differences regarding various genotypic and phenotypic outcomes. Specifically, growth on agar  
425 generally leads to a higher diversity due to greater heterogeneity in environmental conditions and  
426 inefficient competition (Rainey and Travisano, 1998; Kerr et al., 2002; Habets et al., 2007; Frost et  
427 al., 2018; Kayser et al., 2019). In related work (Saebelfeld et al., bioRxiv preprint 2021), we show  
428 that structured environments can affect mutant establishment due to greater variation in local  
429 conditions. These findings may have clinical implications as agar conditions better resemble natural  
430 conditions than liquid medium since most bacteria grow in biofilm or attached to surfaces (Olsen,

## Antibiotic breakdown by susceptible bacteria enhances the establishment of resistant mutants

431 2015; Gupta et al., 2016; Ahmed et al., 2018). The maintenance of resistant cells within sensitive  
432 populations in the absence of antibiotics leads to a higher risk of colonization by the mutant when  
433 antibiotics are applied (De Roode et al., 2004; Pollitt et al., 2014; Olsen, 2015). Here, we show that  
434 this emergence could be further supported when the antibiotic is broken down. Apart from  
435 hydrolyzing enzymes like  $\beta$ -lactamases, those systems could include other antibiotics that are  
436 modified or degraded, such as erythromycin, tetracyclines and chloramphenicol (Nicoloff and  
437 Andersson, 2016).

438 In conclusion, we showed that the removal of CTX from the environment by bacterial cells  
439 expressing  $\beta$ -lactamase enzymes with relatively low activity against the antibiotic enhanced the  
440 establishment probability of mutants with more active enzymes in a structured environment. We  
441 believe that similar positive effects may affect the establishment of mutants resistant to other  
442 antibiotics, as was shown for streptomycin (Alexander and MacLean, 2020), but the size of this effect  
443 will depend on system-specific factors, including the antibiotic target and resistance mechanism, the  
444 ability of the strain for filamentation and the environmental structure. Notably, the positive effect of  
445 susceptible cells on the initial establishment of resistant mutants we report contrasts with their later  
446 impeding influence by preventing the fixation of higher resistance mutants once sufficient antibiotic  
447 has been removed (Yurtsev et al., 2013). Our study is among few demonstrating the importance of  
448 the resistance mechanism and conditions during the emergence of antibiotic resistance. Further  
449 investigations on factors contributing to the establishment of *de novo* resistance mutants in other  
450 systems would contribute to a better understanding of the long-term persistence and re-emergence of  
451 infections with resistant pathogens in clinical settings.

452

### 453 **5 Conflict of Interest**

454 The authors declare that the research was conducted in the absence of any commercial or financial  
455 relationships that could be construed as a potential conflict of interest.

### 456 **6 Author Contributions**

457 All authors conceived the study. MS, JB and AH conducted the experiments. SGD developed the  
458 model with help from JK. MS and SGD wrote the manuscript with help from JK and JAGMdV. All  
459 authors read the manuscript and approved the final version.

### 460 **7 Funding**

461 This work was supported by the German Research Foundation (DFG; CRC 1310 Predictability in  
462 Evolution).

### 463 **8 Acknowledgements**

464 We would like to thank Jeffrey Power for helpful discussions on the manuscript and insight into his  
465 data.

### 466 **9 References**

467 Abel Zur Wiesch, P., Abel, S., Gkatzis, S., Ocampo, P., Engelstädter, J., Hinkley, T., et al. (2015).  
468 Classic reaction kinetics can explain complex patterns of antibiotic action. *Sci. Transl. Med.* 7,  
469 1–12. doi:10.1126/scitranslmed.aaa8760.

## Antibiotic breakdown by susceptible bacteria enhances the establishment of resistant mutants

- 470 Ahmed, M. N., Porse, A., Sommer, M. O. A., Høiby, N., and Ciofu, O. (2018). Evolution of  
471 antibiotic resistance in biofilm and planktonic *Pseudomonas aeruginosa* populations exposed to  
472 subinhibitory levels of ciprofloxacin. *Antimicrob. Agents Chemother.* 62, 1–12.  
473 doi:10.1128/AAC.00320-18.
- 474 Alexander, H. K., and MacLean, R. C. (2020). Stochastic bacterial population dynamics restrict the  
475 establishment of antibiotic resistance from single cells. *Proc. Natl. Acad. Sci. U. S. A.* 117,  
476 19455–19464. doi:10.1073/pnas.1919672117.
- 477 Aslam, B., Wang, W., Arshad, M. I., Khurshid, M., Muzammil, S., Rasool, M. H., et al. (2018).  
478 Antibiotic resistance: a rundown of a global crisis. *Infect. Drug Resist.* 11, 1645–1658.  
479 doi:10.2147/IDR.S173867.
- 480 Banks, M. K., and Bryers, J. D. (1990). Cryptic growth within a binary microbial culture. *Appl.*  
481 *Microbiol. Biotechnol.* 33, 596–601. doi:10.1007/BF00172558.
- 482 Barrera, A., and Pan, T. (2004). Interaction of the *Bacillus subtilis* RNase P with the 30S ribosomal  
483 subunit. *Rna* 10, 482–492. doi:10.1261/rna.5163104.
- 484 Baym, M., Stone, L. K., and Kishony, R. (2016). Multidrug evolutionary strategies to reverse  
485 antibiotic resistance. *Science (80- )*. 351. doi:10.1126/science.aad3292.
- 486 Blair, J. M. A., Webber, M. A., Baylay, A. J., Ogbolu, D. O., and Piddock, L. J. V. (2015). Molecular  
487 mechanisms of antibiotic resistance. *Nat. Rev. Microbiol.* 13, 42–51. doi:10.1038/nrmicro3380.
- 488 Bremer, H., and Dennis, P. P. (1996). Modulation of chemical composition and other parameters of  
489 the cell by growth rate. *EcoSal Plus* 2, 1553–69. doi:10.1128/ecosal.5.2.3.
- 490 Brown, S. P., West, S. A., Diggle, S. P., and Griffin, A. S. (2009). Social evolution in micro-  
491 organisms and a Trojan horse approach to medical intervention strategies. *Philos. Trans. R. Soc.*  
492 *B Biol. Sci.* 364, 3157–3168. doi:10.1098/rstb.2009.0055.
- 493 Chelo, I. M., Nédli, J., Gordo, I., and Teotónio, H. (2013). An experimental test on the probability of  
494 extinction of new genetic variants. *Nat. Commun.* 4, 1–8. doi:10.1038/ncomms3417.
- 495 Cho, H., Uehara, T., and Bernhardt, T. G. (2014). Beta-lactam antibiotics induce a lethal  
496 malfunctioning of the bacterial cell wall synthesis machinery. *Cell* 159, 1300–1311.
- 497 Coates, J., Park, B. R., Le, D., Şimşek, E., Chaudhry, W., and Kim, M. (2018). Antibiotic-induced  
498 population fluctuations and stochastic clearance of bacteria. *Elife* 7, 1–26.  
499 doi:10.7554/eLife.32976.
- 500 De Roode, J. C., Culleton, R., Bell, A. S., and Read, A. F. (2004). Competitive release of drug  
501 resistance following drug treatment of mixed *Plasmodium chabaudi* infections. *Malar. J.* 3, 1–6.  
502 doi:10.1186/1475-2875-3-33.
- 503 Demirci, H., Murphy, F., Murphy, E., Gregory, S. T., Dahlberg, A. E., and Jögl, G. (2013). A  
504 structural basis for streptomycin-induced misreading of the genetic code. *Nat. Commun.* 4.  
505 doi:10.1038/ncomms2346.

## Antibiotic breakdown by susceptible bacteria enhances the establishment of resistant mutants

- 506 Dougherty, T. J., Kennedy, K., Kessler, R. E., and Pucci, M. J. (1996). Direct quantitation of the  
507 number of individual penicillin-binding proteins per cell in *Escherichia coli*. *J. Bacteriol.* 178,  
508 6110–6115. doi:10.1128/jb.178.21.6110-6115.1996.
- 509 Fox, J., and Weisberg, S. (2019). *An {R} companion to applied regression*. 3rd ed. Thousand Oaks  
510 CA: Sage Available at: <https://socialsciences.mcmaster.ca/jfox/Books/Companion/>.
- 511 Frost, I., Smith, W. P. J., Mitri, S., San Millan, A., Davit, Y., Osborne, J. M., et al. (2018).  
512 Cooperation, competition and antibiotic resistance in bacterial colonies. *ISME J.* 12, 1582–1593.  
513 doi:10.1038/s41396-018-0090-4.
- 514 Furusawa, C., Horinouchi, T., and Maeda, T. (2018). Toward prediction and control of antibiotic-  
515 resistance evolution. *Curr. Opin. Biotechnol.* 54, 45–49. doi:10.1016/j.copbio.2018.01.026.
- 516 Gerrish, P. J., and Lenski, R. E. (1998). The fate of competing beneficial mutations in an asexual  
517 population. *Genetica* 102, 127–144.
- 518 Geyrhofer, L., and Brenner, N. (2020). Coexistence and cooperation in structured habitats. *BMC*  
519 *Ecol.* 20, 1–15. doi:10.1186/s12898-020-00281-y.
- 520 Gifford, D. R., De Visser, J. A. G. M., and Wahl, L. M. (2013). Model and test in a fungus of the  
521 probability that beneficial mutations survive drift. *Biol. Lett.* 9. doi:10.1098/rsbl.2012.0310.
- 522 Gullberg, E., Albrecht, L. M., Karlsson, C., Sandegren, L., and Andersson, D. I. (2014). Selection of  
523 a multidrug resistance plasmid by sublethal levels of antibiotics and heavy metals. *MBio* 5, 19–  
524 23. doi:10.1128/mBio.01918-14.Editor.
- 525 Gupta, P., Sarkar, S., Das, B., Bhattacharjee, S., and Tribedi, P. (2016). Biofilm, pathogenesis and  
526 prevention - a journey to break the wall: a review. *Arch. Microbiol.* 198, 1–15.  
527 doi:10.1007/s00203-015-1148-6.
- 528 Habets, M. G., Czarán, T., Hoekstra, R. F., and de Visser, J. A. G. (2007). Spatial structure inhibits  
529 the rate of invasion of beneficial mutations in asexual populations. *Proc. R. Soc. B Biol. Sci.*  
530 274, 2139–2143.
- 531 Haldane, J. B. S. (1927). A mathematical theory of natural and artificial selection, Part V: selection  
532 and mutation. *Math. Proc. Cambridge Philos. Soc.* 23, 838–844.  
533 doi:10.1017/S0305004100015644.
- 534 IACG (2019). No time to wait: securing the future from drug-resistant infections.
- 535 Jones, R. N., and Thornsberry, C. (1982). Cefotaxime: a review of in vitro antimicrobial properties  
536 and spectrum of activity. *Rev. Infect. Dis.* 4 Suppl. doi:10.1093/clinids/4.supplement\_2.s300.
- 537 Kayser, J., Schreck, C. F., Gralka, M., Fusco, D., and Hallatschek, O. (2019). Collective motion  
538 conceals fitness differences in crowded cellular populations. *Nat. Ecol. Evol.* 3, 125–134.  
539 doi:10.1038/s41559-018-0734-9.
- 540 Kerr, B., Riley, M. A., Feldman, M. W., and Bohannan, B. J. M. (2002). Local dispersal promotes  
541 biodiversity in a real-life game of rock-paper-scissors. *Nature* 418, 171–174.

## Antibiotic breakdown by susceptible bacteria enhances the establishment of resistant mutants

- 542 doi:10.1038/nature00823.
- 543 Koch, A. L. (1959). Death of bacteria in growing culture. *J. Bacteriol.* 77, 623–629.  
544 doi:10.1128/jb.77.5.623-629.1959.
- 545 Lenhard, J. R., and Bulman, Z. P. (2019). Inoculum effect of  $\beta$ -lactam antibiotics. *J. Antimicrob.*  
546 *Chemother.* 74, 2825–2843. doi:10.1093/jac/dkz226.
- 547 Leskelä, T., Tilsala-Timisjärvi, A., Kusnetsov, J., Neubauer, P., and Breitenstein, A. (2005).  
548 Sensitive genus-specific detection of *Legionella* by a 16S rRNA based sandwich hybridization  
549 assay. *J. Microbiol. Methods* 62, 167–179.
- 550 Levy, S. F., Blundell, J. R., Venkataram, S., Petrov, D. A., Fisher, D. S., and Sherlock, G. (2015).  
551 Quantitative evolutionary dynamics using high-resolution lineage tracking. *Nature* 519, 181–  
552 186. doi:10.1038/nature14279.
- 553 Martin, S. E., and Iandolo, J. J. (1975). Translational control of protein synthesis in *Staphylococcus*  
554 *aureus*. *J. Bacteriol.* 122, 1136–1143. doi:10.1128/jb.122.3.1136-1143.1975.
- 555 Medaney, F., Dimitriu, T., Ellis, R. J., and Raymond, B. (2016). Live to cheat another day: bacterial  
556 dormancy facilitates the social exploitation of  $\beta$ -lactamases. *ISME J.* 10, 778–787.  
557 doi:10.1038/ismej.2015.154.
- 558 Nicoloff, H., and Andersson, D. I. (2016). Indirect resistance to several classes of antibiotics in  
559 cocultures with resistant bacteria expressing antibiotic-modifying or -degrading enzymes. *J.*  
560 *Antimicrob. Chemother.* 71, 100–110. doi:10.1093/jac/dkv312.
- 561 Nioh, I., and Furusaka, C. (1968). Growth of bacteria in the heat-killed cell suspensions of the same  
562 bacteria. *J. Gen. Appl. Microbiol.* 14, 373–385. doi:10.2323/jgam.14.373.
- 563 Olsen, I. (2015). Biofilm-specific antibiotic tolerance and resistance. *Eur. J. Clin. Microbiol. Infect.*  
564 *Dis.* 34, 877–886. doi:10.1007/s10096-015-2323-z.
- 565 Palmer, A. C., and Kishony, R. (2013). Understanding, predicting and manipulating the genotypic  
566 evolution of antibiotic resistance. *Nat. Rev. Genet.* 14, 243–248. doi:10.1038/nrg3351.
- 567 Patwa, Z., and Wahl, L. M. (2008). The fixation probability of beneficial mutations. *J. R. Soc.*  
568 *Interface* 5, 1279–1289. doi:10.1098/rsif.2008.0248.
- 569 Piras, G., El Kharroubi, A., Van Beeumen, J., Coeme, E., Coyette, J., and Ghuysen, J. M. (1990).  
570 Characterization of an *Enterococcus hirae* penicillin-binding protein 3 with low penicillin  
571 affinity. *J. Bacteriol.* 172, 6856–6862. doi:10.1128/jb.172.12.6856-6862.1990.
- 572 Pogliano, J., Pogliano, K., Weiss, D. S., Losick, R., and Beckwith, J. (1997). Inactivation of FtsI  
573 inhibits constriction of the FtsZ cytokinetic ring and delays the assembly of FtsZ rings at  
574 potential division sites. *Proc. Natl. Acad. Sci. U. S. A.* 94, 559–564. doi:10.1073/pnas.94.2.559.
- 575 Pollitt, L. C., Huijben, S., Sim, D. G., Salathé, R. M., Jones, M. J., and Read, A. F. (2014). Rapid  
576 response to selection, competitive release and increased transmission potential of artesunate-  
577 selected *Plasmodium chabaudi* malaria parasites. *PLoS Pathog.* 10.



## Antibiotic breakdown by susceptible bacteria enhances the establishment of resistant mutants

- 578       doi:10.1371/journal.ppat.1004019.
- 579       Queenan, A. M., Foleno, B., Gownley, C., Wira, E., and Bush, K. (2004). Effects of inoculum and  
580       beta-lactamase activity in AmpC- and extended-spectrum beta-lactamase (ESBL)-producing  
581       *Escherichia coli* and *Klebsiella pneumoniae* clinical isolates tested by using NCCLS ESBL  
582       methodology. *J. Clin. Microbiol.* 42, 269–275. doi:10.1128/JCM.42.1.269.
- 583       R Core Team (2019). R: A language and environment for statistical computing. Available at:  
584       <https://www.r-project.org/>.
- 585       Rainey, P. B., and Travisano, M. (1998). Adaptive radiation in a heterogeneous environment. *Nature*  
586       394, 69–72.
- 587       Rojo-Molinero, E., MacIà, M. D., and Oliver, A. (2019). Social behavior of antibiotic resistant  
588       mutants within *Pseudomonas aeruginosa* biofilm communities. *Front. Microbiol.* 10, 1–11.  
589       doi:10.3389/fmicb.2019.00570.
- 590       Rozen, D. E., De Visser, J. A. G. M., and Gerrish, P. J. (2002). Fitness effects of fixed beneficial  
591       mutations in microbial populations. *Curr. Biol.* 12, 1040–1045. doi:10.1016/S0960-  
592       9822(02)00896-5.
- 593       Rozen, D. E., Philippe, N., De Visser, J. A., Lenski, R. E., and Schneider, D. (2009). Death and  
594       cannibalism in a seasonal environment facilitate bacterial coexistence. *Ecol. Lett.* 12, 34–44.  
595       doi:10.1111/j.1461-0248.2008.01257.x.
- 596       Saebelfeld, M., Das, S. G., Hagenbeek, A., Krug, J., and de Visser, J. A. G. M. (bioRxiv preprint  
597       2021). Stochastic effects on the establishment of mutants resistant to  $\beta$ -lactam antibiotics.  
598       doi:10.1101/2021.02.09.430436.
- 599       Salverda, M. L. M., Dellus, E., Gorter, F. A., Debets, A. J. M., van der Oost, J., Hoekstra, R. F., et al.  
600       (2011). Initial mutations direct alternative pathways of protein evolution. *PLoS Genet.* 7.  
601       doi:10.1371/journal.pgen.1001321.
- 602       Schenk, M. F., Szendro, I. G., Krug, J., and de Visser, J. A. G. M. (2012). Quantifying the adaptive  
603       potential of an antibiotic resistance enzyme. *PLoS Genet.* 8, e1002783.  
604       doi:10.1371/journal.pgen.1002783.
- 605       Smakman, F., and Hall, A. R. (bioRxiv preprint 2020). Exposure to lysed bacteria can promote or  
606       inhibit growth of neighbouring live bacteria depending on local abiotic conditions.  
607       doi:<https://doi.org/10.1101/2020.10.23.352005>.
- 608       Udekwi, K. I., Parrish, N., Ankomah, P., Baquero, F., and Levin, B. R. (2009). Functional  
609       relationship between bacterial cell density and the efficacy of antibiotics. *J. Antimicrob.*  
610       *Chemother.* 63, 745–757. doi:10.1093/jac/dkn554.
- 611       Wickham, H. (2016). *ggplot2: elegant graphics for data analysis*. New York: Springer-Verlag  
612       Available at: <https://ggplot2.tidyverse.org>.
- 613       Yurtsev, E. A., Chao, H. X., Datta, M. S., Artemova, T., and Gore, J. (2013). Bacterial cheating  
614       drives the population dynamics of cooperative antibiotic resistance plasmids. *Mol. Syst. Biol.* 9,

## Antibiotic breakdown by susceptible bacteria enhances the establishment of resistant mutants

615 1–7. doi:10.1038/msb.2013.39.

616 Zahir, T., Wilmaerts, D., Franke, S., Weytjens, B., Camacho, R., Marchal, K., et al. (2020). Image-  
617 based dynamic phenotyping reveals genetic determinants of filamentation-mediated  $\beta$ -lactam  
618 tolerance. *Front. Microbiol.* 11. doi:10.3389/fmicb.2020.00374.

619
